# Supplementary material for: The differential impact of automated insulin delivery systems on body mass index in children with type 1 diabetes
Source: publisher site journal article supplement (doi:10.1515/jpem-2025-0442), 2025-11-17
Supplement: Supplementary file 1 [file j_jpem-2025-0442_suppl_001.docx]

**Title**

The differential impact of Automated Insulin Delivery Systems on Body Mass Index in children with Type 1 Diabetes

**Authors:**

*John Pemberton1, *Catarina Leal 1, Anjanee Kohli 1, Lesley Drummond1, Louise Collins1, Zainaba Mohamed1, Vrinda Saraff1, Renuka P Dias 1,2, Melanie Kershaw1, Ruth Krone 1,Suma Uday 1,3

*Joint first author

**Affiliations:**

1. Birmingham Women's and Children's NHS Foundation Trust, Diabetes & Endocrinology, Birmingham, UK.
2. University of Birmingham Institute of Cancer and Genomic Sciences, Birmingham, UK

3. Department of Metabolism and Systems Science, University of Birmingham, Birmingham, UK

**Corresponding author:**

Dr Suma Uday, Department of Metabolism and Systems Science, University of Birmingham, Birmingham, UK IBR Tower, Level 2, College of Medical and Dental Sciences, Edgbaston, Birmingham, B15 2TT, UK, s.uday.1@bham.ac.uk, 0121 333 9272

**Short title:**

BMI trends in children using automated insulin delivery systems

**Key words:** Blood Glucose Weight, Body Mass Index, Diabetes Mellitus, Type 1

Abstract word count: 249

Manuscript word Count: 4096

Tables: 4

Figures: 1

Supplementary Materials: 0

# **ABSTRACT:**

**Introduction**

Automated insulin delivery (AID) improves glycaemic outcomes in children and young people (CYP) with type 1 diabetes (T1D), but effects on body weight are less clear. We evaluated longitudinal changes in BMI z-score following AID initiation and examined predictors using mixed-effects modelling.

**Materials and Methods**

We retrospectively studied 170 CYP with T1D starting AID at a tertiary centre. BMI z-score was assessed at baseline, six, and twelve months. Predictors of six-month BMI change (ΔBMI) included demographic, socioeconomic, and glycaemic variables with sensor-weighted glucose metrics.

**Results**

Baseline BMI z-score was 0.75 (SD 1.27), rising to 0.90 at six months (p < 0.001) and stable at twelve (p = 0.851 vs six). Increases occurred in underweight (+1.12, 95% CI 0.61–1.62, p < 0.001) and below-average healthy weight (+0.38, 95% CI 0.20–0.57, p < 0.001), with minimal change in overweight or obese groups. Mixed-effects modelling identified baseline BMI z-score (B = –0.14, p < 0.001), baseline mean blood glucose (MBG; B = +0.07, p < 0.001), and their interaction (B = –0.04, p = 0.025) as independent predictors. Age, sex, socioeconomic status, ethnicity, therapy type, HbA1c, and sensor wear were not significant. Across groups, AID increased time in range by 15–17% and reduced HbA1c by 6 mmol/mol without increasing hypoglycaemia.

**Conclusions**

AID supports weight restoration in underweight CYP while maintaining stability in overweight or obese groups. BMI change is determined by baseline BMI and MBG, independent of demographic or treatment factors.

**Key Messages**

- AID therapy increases BMI z-score in underweight children while maintaining stability in those overweight or obese.
- Mixed-effects modelling confirms baseline BMI and mean glucose, not age, sex, HbA1c, or therapy type, predict BMI change.
- Weight redistribution occurs alongside a 15–17% increase in time in range and sustained HbA1c reduction without added hypoglycaemia.

**Abbreviations**

**AID**: Automated Insulin Delivery

**ANOVA**: Analysis of Variance

**BMI:** Body Mass Index

**CGM**: Continuous Glucose Monitoring

**COV:** Co-efficient of variation

**CI**: Confidence Interval

**DKA**: Diabetic Ketoacidosis

**GMI:** Glucose Management Indicator

**HbA1c:** Glycated Haemoglobin

**IQR:** Interquartile Range

**NICE:** National Institute for Health and Care Excellence

**PSU:** Percentage Sensor Use

**SD:** Standard Deviation

**SH**: Severe Hypoglycaemia

**SPSS:** Statistical Package for the Social Sciences

**TAR:** Time Above Range (percentage of time glucose is >10.0 mmol/L)

**TAR2:** Time Above Range Level 2 (percentage of time glucose is >13.9 mmol/L)

**TBR**: Time Below Range (percentage of time glucose is <3.9 mmol/L)

**TBR2:** Time Below Range Level 2 (percentage of time glucose is <3.0 mmol/L)

**TITR**: Time in Tight Range (percentage of time glucose is between 3.9–7.8 mmol/L)

**TIR**: Time in Range (percentage of time glucose is between 3.9–10.0 mmol/L)

**Introduction**

**Automated Insulin Delivery (AID) systems represent a transformative advancement in the management of type 1 diabetes (T1D) in children and young people (CYP). Given the dynamic and unpredictable nature of childhood activity levels and dietary patterns, continuous insulin adjustments without repeated parental or caregiver intervention are essential for maintaining optimal glycaemic control** (1)**. AID systems integrate real-time continuous glucose monitoring (CGM) with insulin pumps, using algorithm-driven adjustments to automate insulin delivery** (2)**. Multiple studies and systematic reviews have demonstrated that AID systems significantly enhance glycaemic outcomes, increasing time in range (TIR, 3.9-10.0 mmol/L) whilst reducing hyperglycaemia and hypoglycaemia, and improving the quality of life for both people living with T1D and their caregivers** (3–5)**. These benefits have led to their widespread recommendation as the best therapeutic option for CYP with T1D** (6,7)**.**

**While the glycaemic benefits of AID therapy are well established, its impact on body weight remains unclear. Real-world data from over five hundred adult users suggest that body mass index (BMI) increases during the first five months of AID therapy (8). In contrast, for CYP transitioning to AID systems, BMI z-score appears to remain stable in both clinical** (9) **and real-world settings** (10). However, previous analyses have largely relied on univariate assessments, without considering key underlying factors such as baseline BMI status, gender, ethnicity, socioeconomic status (SES), and diabetes duration.Furthermore, historical data from the Diabetes Control and Complications Trial suggests that improvements in glycaemic control are strongly linked to weight gain over time (11). This raises concerns about a potential increase in obesity-related complications, particularly among individuals at higher risk. Large international paediatric datasets consistently report that advanced diabetes technologies and intensified insulin regimens are associated with increased overweight and obesity prevalence (12–14). While prior research suggests that, on average, BMI z-score does not significantly change upon transition to AID therapy (9), unstratified assessments may obscure patterns of BMI redistribution across different BMI categories (15). Given the widespread adoption of AID systems, it is essential to investigate their real-world impact on BMI with a more comprehensive and nuanced approach. One study examining meal distribution and BMI in children using AID found that while AID improved TIR and increased both meal frequency and insulin use, it had no significant impact on BMI (16). However, further studies are needed to determine whether AID has differential effects based on individual characteristics.

Following the implementation of a clinically validated hybrid virtual onboarding programme for AID systems in our tertiary center (17), we set out to evaluate longitudinal changes in BMI z-score over 12 months. This study aims to address the existing knowledge gap by assessing the weight trajectory of CYP using AID, considering key demographic and clinical variables to better understand the real-world effects of these systems on BMI z-score changes.

The primary aim was to assess changes in BMI z-score from baseline to six and twelve months after transitioning to AID therapy in children and young people with type 1 diabetes. The secondary aim was to identify predictors of BMI z-score change over six months using a mixed-effects model.

- **Methods and Materials**

**Study Design**
This retrospective cohort study was conducted at Birmingham Women’s and Children’s NHS Foundation Trust, a tertiary care centre specialising in paediatric diabetes. Data was collected from CYP with T1D who commenced AID systems between April 2021 and December 2024.

**Study Population**.

Our centre primarily serves a socioeconomically and ethnically diverse population, with 80% of patients from the two most deprived socioeconomic quintiles and more than half from ethnic minority backgrounds (18). This contrasts with national demographics, where more than 70% of the population is white, and less than 50% falls within the two most deprived quintiles (18). Specialist care is provided for 285 children and young people with type 1 diabetes, supported by a multidisciplinary team comprising two full time equivalent consultant diabetologists, five paediatric diabetes nurses, two paediatric diabetes dietitians, a psychologist, a family support and a part time social worker and youth worker.

The analysis included CYP with a confirmed diagnosis of T1D (with at least one antibody positive) who met the following inclusion criteria:

- Completion of the validated CGM Academy programme (19), with a minimum of 50% sensor data capture over the 90 days (20) prior to AID initiation.
- Completion of the validated AID programme (17) with at least 12 months usage, with a minimum of 50% sensor data capture for the 90 days (20) preceding 3, 6, and 12 months of AID system use.

Exclusion criteria:

- Use of an AID system prior to the study period.
- Insufficient CGM data (<50% capture).
- Diagnosis of T1D for less than three months.

**Onboarding Programmes for CGM and AID Systems**

Our CGM Academy (19) and AID onboarding programmes (17) have been detailed in previous publications. We have demonstrated effectiveness of the programmes though improved glycaemic metrics. Both programmes prioritise dynamic glucose management and primarily use a virtual hybrid model while retaining a face-to-face option for those who require additional support due to language barrier or other social factors. Dynamic glucose management includes using physical activity to optimise TIR. A key teaching point is that just 15 minutes of activity can lower glucose levels by approximately 2 mmol/L when above 10 mmol/L between meals (19). The increasing use and implementation of this taught strategy has demonstrated a strong positive association with TIR (19,21). The effectiveness of physical activity has also been demonstrated in a large real-world dataset that includes both adolescents and adults (22).

**Data Collection**
Data was collected at AID initiation (baseline), 6 and 12-months post AID-initiation. Information was extracted from the electronic patient record system (TWINKLE) and included:

- **Demographics:** Age, gender, and ethnicity, based on self-reported data and classified according to UK Census categories (White, Asian, Black, Mixed, and Other) (23).
- **Socio-Economic Status (SES):** Determined using the Index of Multiple Deprivation (IMD), which is based on 37 indicators across seven domains. IMD scores range from 1 (most deprived) to 32,844 (least deprived) (24).
- **Main Carer Education:** Categorised as: No qualifications, 1-4 GCSEs (grades A-C), ≥5 GCSEs (grades A-C), ≥2 A-levels or equivalent, or university degree (23).
- **Anthropometric Data:** Height (cm), weight (kg), BMI z-score, calculated using 1990 UK data (25)
- **BMI z-score Groups**: Participants were classified into five groups according to their baseline BMI z-score to assess changes in BMI z-score over time. Using World Health Organisation (WHO) BMI classifications (15) with the healthy weight category split by below and above 0 (50th centile), the predefined thresholds were obese (BMI z-score ≥ 2), overweight (BMI z-score ≥ 1 to ≤ 2), healthy weight above average (BMI z-score >0 to <1), healthy weight below average (BMI z-score >-2 to ≤0) and underweight (BMI z-score ≤-2) (15).
- **Disease and treatment specifics:** duration of diabetes was captured in years and months. Insulin Delivery Methods were **c**ategorised as multiple daily injections (MDI) or continuous subcutaneous insulin infusion (CSII).The AID Systems in use included MiniMed 780G using Guardian 3 and 4 Sensors, CamAPS FX (CAMS) using Dexcom G6 sensors, t:slim X2 with Control IQ (CIQ) using Dexcom G6 sensors, and Omnipod 5 (OP5) using Dexcom G6 sensors.

*HbA1c Measurements:*
HbA1c (mmol/mol) readings were obtained at three time points: at initiation of AID (baseline), followed by assessments at 6 and 12 months. These measurements were conducted using the Siemens DCA Vantage point-of-care device, which is aligned with International Federation of Clinical Chemistry (IFCC) reference standards. The device has been shown to closely correspond with laboratory-based HbA1c testing (r = 0.99) (26) and has a maximum measurable value of 130 mmol/mol.

*Glycaemic Metrics*

CGM metrics were collected for the 90-days preceding HbA1c measurements at baseline, 6-months and 12-months. Also, for the first 90-days (3-months) post-initiation. Internationally agreed CGM metrics (27) were collected from Dexcom Clarity and Glooko.

- Mean blood glucose (MBG, mmol/L).
- Time Below Range Level 2 (TBR2): Percentage of time glucose was <3.0 mmol/L
- Time Below Range (TBR): Percentage of time glucose was <3.9 mmol/L
- Time in Tight Range (TITR): Percentage of time glucose was 3.9–7.8 mmol/L
- Time in Range (TIR): Percentage of time glucose was 3.9–10.0 mmol/L
- Time Above Range (TAR): Percentage of time glucose was >10.0 mmol/L
- Time Above Range Level 2 (TAR2): Percentage of time glucose was >13.9 mmol/L
- Coefficient of Variation (COV %).
- Percent Sensor Use (PSU %).

*Daily insulin units*
At baseline, 90-day average daily insulin usage for CSII patients were collected from Glooko and Carelink. Similarly, AID system insulin usage at 6 and 12-months was collected from the same platforms. MDI patients self-reported average daily insulin usage for the 90-days prior to starting AID therapy. Insulin units per kilogram (u/kg/day) was calculated for each patient using synchronised weight for all time points.

*Weighted averages of 6-months data*

To minimise bias in BMI z-score group comparisons, both between and within groups, a weighted average approach was applied to time-dependent glycaemic variables (28). This method ensured that periods with higher sensor utilisation contributed proportionally more to the overall metric and used the following formula:

| ​((3-months variable value​* PSU 3-months ​) + (6-months variable value​* PSU 6-months))  ÷  ((PSU 3-months)​+(PSU 6-months)) |
| --- |

The 3-month value and 6-month value refer to the recorded 90-day average CGM at each time point (e.g., MBG, TBR2, TBR, TITR, TIR, TAR, TAR2, COV, PSU). PSU at 3 months and PSU at 6 months represent the percentage of time CGM data were available at each respective time point. This weighting method ensured that periods with greater CGM adherence contributed proportionally more to the final estimate, preventing over-representation of time points with lower data capture. The baseline 90-day CGM metrics were then deducted from 6-month 180-day weighted averages to get the Δ6month CGM metrics.

**Statistical Analysis**

All statistical analyses were conducted using IBM SPSS Statistics (Version 30), with a significance threshold of p < 0.05. Descriptive statistics were used to summarise the cohort, with continuous variables presented as mean (±SD) or median (IQR) depending on distribution, and categorical variables as frequency (%). Comparisons between baseline, six-month, and twelve-month values were performed using ANOVA with Bonferroni post-hoc testing. Within-group comparisons were made using paired t-tests.

To identify predictors of BMI z-score change over six months (ΔBMI z-score), a mixed-effects model with maximum likelihood estimation was employed (29). This approach was chosen over repeated-measures ANOVA or general linear models because it accounts for the hierarchical, longitudinal structure of the data and individual-level variability. Random intercepts were included to improve within-subject comparisons.

Candidate predictors included demographic (age, sex, ethnicity, socioeconomic status, main carer education), clinical (diabetes duration, therapy type), anthropometric (baseline BMI z-score), and glycaemic variables (baseline HbA1c, MBG, TIR, TAR, and corresponding 6-month Δ values). Variables were screened in univariate analyses (ANOVA, Spearman’s rank), and those significant at p < 0.05 were entered into general linear models. Collinearity was assessed using variance inflation factor (VIF), with >5 indicating concern.

The final mixed-effects model retained baseline BMI z-score and baseline MBG, with an interaction term (BMI × MBG) included based on model fit (lower AIC/BIC) and *Ethical Considerations*

The project received approval from the institutional audit committee at Birmingham Women’s and Children’s Hospital (CARMS-31489).

**Results**

Of the 285 CYP in the service at the time of the study, 180 on AID systems were screened for inclusion. Of those screened, eight were excluded due to a diagnosis under three months and two were excluded for less than 50% CGM data at baseline.

*Baseline characteristics*

The cohort included 170 CYP (53% male) with a mean age of 12.4 years (±3.5), a mean diabetes duration of 5.9 years (±3.7). Most deprived quintile residents constituted 52% of the cohort. Ethnic distribution was 44% White, 34% Asian, 16% Black, and 6% Mixed/Other. The distribution of main carer education levels for the cohort was as follows; 30% of primary caregivers reported having a university degree, 9% had achieved two or more A-levels or equivalent qualifications, and 19% had completed five or more GCSEs at grades A-C. Additionally, 21% of caregivers reported attaining one to four GCSEs at grades A-C, while 22% had no formal qualifications. The AID systems selected were primarily OP5 (47%) and CIQ (44%). The distribution of prior therapy type (MDI vs pump) was similar across BMI z-score categories, with no significant differences observed.

**Total cohort analysis**

*BMI-z Score: baseline to 6 and 12-months post-AID initiation*

**At baseline, the mean BMI z-score was 0.75 (±1.27), increasing significantly to 0.90 (±1.28) at six months (p < 0.001). Between six and twelve months, the BMI z-score remained stable at 0.88 (±1.26), which was significantly higher than baseline (p < 0.001) but not significantly different from the six-month value (p = 0.510) (Table 1). Sub-group analysis therefore focused only on assessing the change in BMI z-score (ΔBMI z-score) from baseline to six months following AID initiation.**

***Insulin usage:*** *baseline to 6 and 12-months post-AID initiation*

**Daily insulin usage per kilogram remained stable throughout the 12 months, with a baseline value of 0.89 u/kg/day (±0.27), decreasing slightly to 0.84 u/kg/day (±0.28) at six months (p = 0.155), before returning to 0.89 u/kg/day (±0.26) at twelve months (p = 0.155) (Table 1).**

*Glucose metrics: baseline to 6 and 12-months post-AID initiation*

HbA1c reduced from 61.9 mmol/mol (±10.1) to 54.8 mmol/mol (±9.4) at 6-months which was maintained at twelve months (55.9 ±9.7) (p < 0.001). MBG dropped from 10.7 mmol/L (±1.7) to 9.1 mmol/L (±0.9) at three months (p < 0.001), sustaining at 9.4 mmol/L (±1.2) and 9.5 mmol/L (±1.4) at six and twelve months which remained significantly lower than baseline (p < 0.001). TAR significantly decreased from 49.6% (±14.2) at baseline to 32.6% (±9.6) at three months (p < 0.001), with sustained reductions at six (35.1% ±11.2, p < 0.001) and twelve months (36.1% ±12.1, p < 0.001). Similarly, TAR2 dropped from 23.2% (±13.1) to 11.9% (±7.0) at three months (p < 0.001), remaining lower at six (13.5% ±9.4, p < 0.001) and twelve months (14.7% ±10.0, p < 0.001). TIR increased from 48.2% (±13.5) to 65.4% (±9.5) at three months (p < 0.001), with sustained improvements at six (63.0% ±11.0, 0 < 0.001) and twelve months (62.1% ±11.7, p < 0.001). TITR also rose from 29.0% (±10.5) to 44.1% (±9.4) at three months (p < 0.001), and remained elevated at six (42.0% ±9.4, p < 0.001) and twelve (40.6% ±10.8, p < 0.001). In contrast, TBR and TBR2 showed no significant changes, remaining stable of ~2% (p = 0.125) and ~0.4% (p = 0.938), respectively. Coefficient of variation (CV) remained largely unchanged (baseline: 39.9% ±5.0; twelve months: 39.0% ±4.5, p = 0.257) **(Table 1)**.

**Sub-group analysis**

***Baseline BMI z-score groups***

Participants were classified into five BMI z-score groups at baseline: obese (n = 34), overweight (n = 45), healthy weight above average (n = 45), healthy weight below average (n = 38), and underweight (n = 8).  **At baseline and six months, significant differences were observed in the underweight and healthy weight below average as explained in the subsequent text. (Table 2).**

***BMI z-score:*** *baseline to 6 months post-AID initiation*

BMI z-score changes were minimal among those in the obese group (2.44 to 2.45, ΔBMI z-score: 0.01, 95% CI: -0.09 to 0.11, p = 0.859), overweight group (1.40 to 1.45, ΔBMI z-score: 0.05, 95% CI: -0.05 to 0.16, p = 0.814) and in the healthy weight above average group (0.46 to 0.52, ΔBMI z-score: 0.06, 95% CI: -0.04 to 0.17, p = 0.321). However, participants in the healthy weight below average category showed a significant increase in BMI z-score from -0.59 to -0.21 (ΔBMI z-score: 0.38, 95% CI: 0.20 to 0.57, p < 0.001) whilst the underweight group exhibited the most substantial increase in BMI z-score, rising from -2.31 to -1.19 (ΔBMI z-score: 1.13, 95% CI: 0.13 to 2.12, p < 0.001 **Table 2 and Figure 1 panel A**).

A one-way ANOVA confirmed a significant overall between group effect of baseline BMI z-score group on ΔBMI z-score (p < 0.001), with post-hoc Bonferroni tests revealing that the underweight group had a significantly greater increase compared to all other groups (p < 0.001, **Table 3 and Figure 1 panel A**). However, no significant differences were observed between the healthy weight above average, overweight, and obese groups (**Table 3 and Figure 1 panel A**). Furthermore, the healthy weight below average group had a significantly greater increase in ΔBMI z-score compared to all other groups other than the underweight group (p < 0.05, Table 4 and Figure 1 panel A).

***Insulin usage:*** *baseline to 6 months post-AID initiation*

Daily insulin requirements did not change across BMI z-score groups, except in the obese category, where there was a small but statistically significant decrease from 0.96 to 0.87 u/kg/day (Δu/kg/day: -0.09, 95% CI: -0.17 to -0.01, p = 0.028, Table 3). No significant differences were observed in ΔBMI z-score between groups (**Table 3 and Figure 1 panel C**).

*Glucose metrics: baseline to 6 months post-AID initiation*

HbA1c decreased significantly across all BMI z-score groups with ΔHbA1c ranging from -9.8 to -6.8 to (p < 0.001) with no between group differences. MBG, TAR, and TAR2 followed a similar trend, with changes between -1.7 to -1.4 mmol/L (p < 0.001) for MBG, -16.0% to -14.0% (p < 0.001) for TAR, and -11.9% to -10.4% (p < 0.001) for TAR2, all with no differences between groups. In contrast, TITR, TIR and PSU improved across all groups, with TITR increasing by 13.4% to 15.5% (p < 0.001), TIR by 15.6% to 16.9% (p < 0.001), and PSU by 8.2% to 12.3% (p < 0.001 for most groups), again, all with no between group differences. Neither TBR2, TBR nor COV showed any significant changes over six months or differences between groups. Full analysis is detailed in **Tables 2 and 3 and** illustrated in **Figure 1**.

**Mixed-effects Model**

In univariate screening, demographic variables including age, sex, ethnicity, socioeconomic status, and main carer education were not associated with change in BMI z-score (all p > 0.05). Similarly, diabetes duration, insulin therapy type (MDI vs CSII), AID system, and glycaemic measures such as baseline or ΔHbA1c, TIR, TAR, and insulin dose were non-significant predictors and excluded from further modelling. Sensor wear duration was not significantly different between prior therapy groups and was not retained as a predictor of BMI change. Baseline BMI z-score and baseline MBG were retained, as both were significant in univariate analyses (p < 0.001 for each).

The final mixed-effects model (**Table 4)** identified baseline BMI z-score (B = –0.14, 95% CI: –0.19 to –0.09, p < 0.001) and baseline MBG (B = +0.07, 95% CI: 0.03 to 0.11, p < 0.001) as independent predictors of BMI z-score change over six months. A significant interaction between baseline BMI z-score and MBG was also observed (B = –0.04, 95% CI: –0.07 to 0.00, p = 0.025), indicating that the effect of glycaemia on BMI change varied by initial BMI status. The model intercept was –0.47 (95% CI: –0.90 to –0.04, p = 0.032).

Model diagnostics confirmed robustness, with improved fit following inclusion of the interaction term (AIC 211 vs 214; BIC 230 vs 229). The intraclass correlation coefficient was 0.000, indicating minimal unexplained between-subject variability, and both marginal and conditional R² values were 0.20. Residual analysis supported assumptions of normality and homoscedasticity. HbA1c was not a significant predictor in either univariate or multivariable models.

**Discussion**

This study provides new insights into the impact of AID systems on BMI z-score trajectories in children and young people with type 1 diabetes. Consistent with earlier reports (8,30), we observed stability in BMI for most of the cohort, with increases primarily among those underweight or below the average range at baseline. Importantly, our mixed-effects modelling demonstrated that baseline BMI and mean blood glucose (MBG) were the independent predictors of BMI change, while other demographic and clinical factors, including age, sex, ethnicity, socioeconomic status, carer education, therapy type, and sensor wear, were not significant. This modelling provides a robust explanation for the redistribution effect we observed and addresses the potential confounders raised by reviewers.

These BMI changes occurred in parallel with clinically meaningful improvements in glycaemic outcomes. Across all BMI groups, time in range increased by 15–17% and HbA1c improved by approximately 6 mmol/mol, sustained at 12 months. Time above range fell substantially, and importantly, there was no increase in hypoglycaemia. These findings are consistent with and extend prior real-world studies of AID confirming that substantial glycaemic benefit is achieved without an accompanying rise in obesity risk (8,10,30).

Concerns about weight gain with improved glucose control are longstanding. Historical data from the DCCT demonstrated a uniform link between tighter glucose control and increased weight (11). More recently, data suggests rising BMI trajectories in young people using intensive insulin regimens and advanced technologies (31). This reinforces concerns that technology-driven improvements in glycaemia may exacerbate obesity risk. Large international paediatric datasets have further demonstrated that intensified insulin regimens and advanced technologies are associated with increased prevalence of overweight and obesity (12–14). Our results refine this narrative by showing that AID acts as a metabolic modulator: underweight or leaner children gain weight appropriately, while overweight or obese children improve glycaemic control without further weight gain.

The interaction between baseline BMI and MBG further clarified the observed pattern: higher MBG predicted greater increases in BMI among those starting with lower BMI z-scores, but this association was attenuated in participants already overweight or obese. This supports a mechanistic explanation in which improved glycaemic control through AID reduces caloric loss via glycosuria in leaner individuals, facilitating weight restoration, while those with higher BMI benefit metabolically without additional weight gain. This nuance contrasts with the uniform effect described in the DCCT (11) and underscores the weight-redistributive rather than weight-promoting nature of AID.

A further strength of this analysis was the use of weighted CGM metrics across the 3- and 6-month follow-up periods. This approach ensured that periods of higher sensor wear contributed proportionally more to the calculation of glycaemic variables, minimising bias from incomplete data. To our knowledge, this method has rarely been applied in paediatric AID studies and represents a novel way of safeguarding against artefacts from variable device adherence. By addressing missingness explicitly, we provide greater confidence that the observed associations reflect true metabolic relationships rather than technical artefacts.

Notably, HbA1c was not retained as a predictor of BMI change in the mixed-effects model. This is consistent with our recent work showing that children and young people of Black heritage have HbA1c values 4–5 mmol/mol higher than White or South Asian peers despite equivalent MBG and time in range, confirming HbA1c is not a reliable surrogate for direct glucose exposure in diverse groups. Direct CGM-derived measures such as MBG are therefore more physiologically relevant (32).

Our findings also speak to concerns regarding subgroup differences. Age and sex were tested and found not to be significant predictors in either univariate or multivariable analyses, addressing the possibility that puberty or sex-specific factors might explain the results. Second, pubertal status was not directly captured, and while age was tested in the model, pubertal staging would have provided more granular insight. Similarly, prior therapy type (multiple daily injections versus pump therapy) and sensor duration were not associated with BMI change in the model. These null findings provide reassurance that the observed redistribution was not driven by baseline therapy characteristics or CGM exposure but reflects the combined effect of BMI status and glycaemia.

Previous studies have sometimes reported no overall change in BMI following transition to AID (10,30) but unstratified reporting may have masked important subgroup effects. Supporting this, a study examining meal distribution in children using AID found that while TIR improved and meal frequency increased, BMI did not change overall (16). By applying stratified analyses and modelling, we highlight redistribution that aligns with physiological need.

Limitations must be acknowledged. First, the underweight subgroup was small (n=8), which reduces the precision of estimates for this group. While the direction and magnitude of effect were consistent, these results should be interpreted cautiously. BMI is a proxy for adiposity and does not distinguish fat from lean mass; future work should include body composition. Finally, diet, physical activity, and eating behaviours were not measured.

Despite these limitations, strengths include longitudinal weighted CGM approach to minimise bias, and inclusion of a large, ethnically diverse, socioeconomically deprived population. A further strength of this analysis was the use of mixed-effects modelling to maximise statistical power in a single-centre cohort. Together, these factors maximise relevance to real-world practice.

From a clinical standpoint, these results provide reassurance. Overweight and obese children can expect improved glucose control without further weight gain, while those underweight or below average can achieve catch-up growth. Taken together, the findings suggest that AID is a weight-redistributive rather than weight-promoting intervention, aligning weight trajectories more closely with physiological need.

These results also have policy implications. The recent NICE technology appraisal mandating national rollout of AID (7) is further supported by our finding that AID improves glucose control and supports healthy weight redistribution without promoting excess gain. This strengthens the case for universal provision, particularly in diverse and socioeconomically deprived cohorts.

**Conclusion**

Automated insulin delivery supports healthy weight redistribution in children and young people with type 1 diabetes. Underweight or leaner individuals experience appropriate weight restoration, while those already overweight or obese maintain weight stability. These outcomes occur alongside significant improvements in time in range and HbA1c without increasing hypoglycaemia. Baseline BMI and mean blood glucose, rather than age, sex, or therapy type, predict weight change. Taken together, these findings show that AID systems act as metabolic modulators, improving glycaemic control while aligning weight trajectories with physiological need.

**Contributions**JP: Design, background research, data collection, statistics, manuscript writing

CL: Design, background research, data collection, manuscript writing

AK: Data collection and manuscript review

RD, MK, RK, VS: Manuscript review

SU: Design, statistics, manuscript writing, intellectual revision

All authors were involved in the approval of the final version for publication

**Conflicts of interest**

JP: Advisory Board for ROHCE and Abbott and speaker payments for Dexcom and Insulet.

CL, AK, LD, LC, ZM, VS, RD, RK, MK & SU: Nothing to disclose.

**Patient and Public Involvement Statement**
Patients and the public were not involved in the design, conduct, reporting, or dissemination of this research. This study involved a retrospective analysis of anonymised routinely collected data, and as such, direct patient or public involvement was not applicable.

**Funding statement**

This work did not receive any specific funds and was performed as part of service evaluation at Birmingham Women’s and Children’s Foundation Trust.

**Ethics Approval**

This project was approved as a service development initiative by our institutional audit committee (CARMS-31489), as the data collected complied with national data requirements. Therefore, patient consent was not required.

**Acknowledgments**

We would like to gratefully acknowledge the contribution of the Diabetes Team at Birmingham Women’s and Children’s hospital for delivery of the AID teaching programmes and the clinicians involved in care delivery. Most importantly, we would like to thank all the CYP with T1D and their families for their feedback on the education approaches.

**References**

1. Aiello EM, Deshpande S, Özaslan B, Wolkowicz KL, Dassau E, Pinsker JE, et al. Review of Automated Insulin Delivery Systems for Individuals with Type 1 Diabetes: Tailored Solutions for Subpopulations. Curr Opin Biomed Eng. 2021 Sep 1;19.

2. Moon SJ, Jung I, Park CY. Current Advances of Artificial Pancreas Systems: A Comprehensive Review of the Clinical Evidence. Diabetes Metab J. 2021 Nov 1;45(6):813–39.

3. Zeng B, Gao L, Yang Q, Jia H, Sun F. Automated Insulin Delivery Systems in Children and Adolescents With Type 1 Diabetes: A Systematic Review and Meta-analysis of Outpatient Randomized Controlled Trials. Diabetes Care. 2023 Dec 1;46(12):2300–7.

4. Peacock S, Frizelle I, Hussain S. A Systematic Review of Commercial Hybrid Closed-Loop Automated Insulin Delivery Systems. Diabetes Therapy 2023 14:5. 2023 Apr 5;14(5):839–55.

5. Knoll C, Peacock S, Wäldchen M, Cooper D, Aulakh SK, Raile K, et al. Real-world evidence on clinical outcomes of people with type 1 diabetes using open-source and commercial automated insulin dosing systems: A systematic review. Diabetic Medicine. 2022 May 1;39(5):e14741.

6. Biester T, Berget C, Boughton C, Cudizio L, Ekhlaspour L, Hilliard ME, et al. ISPAD Clinical Practice Consensus Guidelines 2024: Diabetes Technologies: Insulin Delivery. Horm Res Paediatr. 2024 Dec 10;1–34.

7. NICE (National Institute for Health and Care Excellence). Technology appraisal guidance [TA943] Hybrid closed loop systems for managing blood glucose levels in type 1 diabetes [Internet]. NICE; [cited 2023 Dec 19]. Available from: https://www.nice.org.uk/guidance/ta943

8. Crabtree TSJ, Griffin TP, Yap YW, Narendran P, Gallen G, Furlong N, et al. Hybrid Closed-Loop Therapy in Adults With Type 1 Diabetes and Above-Target HbA1c: A Real-world Observational Study. Diabetes Care [Internet]. 2023 Oct 1 [cited 2025 Mar 11];46(10):1831–8. Available from: https://pubmed.ncbi.nlm.nih.gov/37566697/

9. Passanisi S, Salzano G, Bombaci B, Minuto N, Bassi M, Bonfanti R, et al. Sustained Effectiveness of an Advanced Hybrid Closed-Loop System in a Cohort of Children and Adolescents With Type 1 Diabetes: A 1-Year Real-World Study. Diabetes Care. 2024 May 20;47(6):1084–91.

10. Seget S, Jarosz-Chobot P, Ochab A, Polanska J, Rusak E, Witoszek P, et al. Body mass index, basal insulin and glycemic control in children with type 1 diabetes treated with the advanced hybrid closed loop system remain stable - 1-year prospective, observational, two-center study. Front Endocrinol (Lausanne). 2022 Oct 11;13.

11. Carlson NE, Horton KW, Hokanson JE, Cleary PA, Jacobs DR, Brunzell JD, et al. Weight gain trajectories and obesity rates in intensive and conventional treatments of Type 1 diabetes from the DCCT compared to a control population without diabetes. Diabet Med [Internet]. 2022 May 1 [cited 2025 Jan 31];39(5):e14794. Available from: https://pmc.ncbi.nlm.nih.gov/articles/PMC9174023/

12. Fröhlich-Reiterer EE, Rosenbauer J, Bechtold-Dalla Pozza S, Hofer SE, Schober E, Holl RW. Predictors of increasing BMI during the course of diabetes in children and adolescents with type 1 diabetes: data from the German/Austrian DPV multicentre survey. Arch Dis Child [Internet]. 2014 [cited 2025 Feb 4];99(8):738–43. Available from: https://pubmed.ncbi.nlm.nih.gov/24812301/

13. De Vries L, Bar-Niv M, Lebenthal Y, Tenenbaum A, Shalitin S, Lazar L, et al. Changes in weight and BMI following the diagnosis of type 1 diabetes in children and adolescents. Acta Diabetol [Internet]. 2014 [cited 2025 Feb 4];51(3):395–402. Available from: https://pubmed.ncbi.nlm.nih.gov/24158774/

14. Marigliano M, Eckert AJ, Guness PK, Herbst A, Smart CE, Witsch M, et al. Association of the use of diabetes technology with HbA1c and BMI-SDS in an international cohort of children and adolescents with type 1 diabetes: The SWEET project experience. Pediatr Diabetes [Internet]. 2021 Dec 1 [cited 2025 Feb 4];22(8):1120–8. Available from: https://pubmed.ncbi.nlm.nih.gov/34716736/

15. Cole TJ, Bellizzi MC, Flegal KM, Dietz WH. Establishing a standard definition for child overweight and obesity worldwide: international survey. BMJ. 2000 May 6;320(7244):1240.

16. Piccini B, Felicioni M, Pessina B, Bertini M, Casalini E, Ceccotti C, et al. Glycemic Control, Basal/Bolus Distribution, BMI and Meal Management in Children and Adolescents with Type 1 Diabetes and Advanced Hybrid Closed Loop. Nutrients [Internet]. 2023 Dec 1 [cited 2025 Mar 11];15(23). Available from: https://pubmed.ncbi.nlm.nih.gov/38068733/

17. Pemberton JS, Collins L, Drummond L, Dias RP, Krone R, Kershaw M, et al. Enhancing equity in access to Automated Insulin Delivery systems in an ethnically and socio-economically diverse group of children with Type 1 Diabetes. British Medical Journal Diabetes Open Research & Care. 2024;in press.

18. RCPCH (Royal College of Paediatrics and Child Health). NPDA 2021-22 Report on care and outcomes [Internet]. 2022 [cited 2023 Dec 28]. Available from: https://www.rcpch.ac.uk/sites/default/files/2023-03/npda_2021-22_report_on_care_and_outcomes.pdf

19. Pemberton JS, Barrett TG, Dias RP, Kershaw M, Krone R, Uday S. An effective and cost-saving structured education program teaching dynamic glucose management strategies to a socio-economically deprived cohort with type 1 diabetes in a VIRTUAL setting. Pediatr Diabetes [Internet]. 2022 Jun 11 [cited 2022 Jun 11];23(7):1045–56. Available from: https://onlinelibrary.wiley.com/doi/full/10.1111/pedi.13381

20. Christakis NJ, Gioe M, Gomez R, Felipe D, Soros A, McCarter R, et al. Determination of Glucose-Independent Racial Disparity in HbA1c for Youth With Type 1 Diabetes in the Era of Continuous Glucose Monitoring. J Diabetes Sci Technol. 2023;Sep 12:19322968231199113. doi: 10.1177/19322968231.

21. Pemberton JS, Gupta A, Lau GM, Dickinson I, Iyer PV, Uday S. Integrating Physical Activity Strategies to Lower Hyperglycaemia in Structured Education Programmes for Children and Young People with Type 1 Diabetes Improves Glycaemic Control without Augmenting the Risk of Hypoglycaemia. Smart CE, editor. Pediatr Diabetes [Internet]. 2023 Jul 5 [cited 2023 Jul 10];2023:1–8. Available from: https://www.hindawi.com/journals/pedi/2023/2519368/

22. Pemberton J, Li Z, Gal RL, Turner L V., Bergford S, Calhoun P, et al. Duration of physical activity required to Ameliorate hyperglycemia without causing hypoglycemia in type 1 diabetes: A T1DEXI adults and pediatric cohort analyses. Diabetes Res Clin Pract [Internet]. 2024 Feb 1 [cited 2025 Feb 1];220. Available from: https://pubmed.ncbi.nlm.nih.gov/39733989/

23. Office for National Statistics. Education, England and Wales - Office for National Statistics [Internet]. [cited 2023 Oct 9]. Available from: https://www.ons.gov.uk/peoplepopulationandcommunity/educationandchildcare/bulletins/educationenglandandwales/census2021

24. Gov.uk. English indices of deprivation 2019 - GOV.UK [Internet]. [cited 2023 Oct 9]. Available from: https://www.gov.uk/government/statistics/english-indices-of-deprivation-2019

25. Cole TJ, Williams AF, Wright CM. Revised birth centiles for weight, length and head circumference in the UK-WHO growth charts. Ann Hum Biol. 2011 Jan;38(1):7–11.

26. Ontario HQ. Point-of-Care Hemoglobin A1c Testing: An Evidence-Based Analysis. Ont Health Technol Assess Ser. 2014;14(8):1.

27. Battelino T, Danne T, Bergenstal RM, Amiel SA, Beck R, Biester T, et al. Clinical targets for continuous glucose monitoring data interpretation: Recommendations from the international consensus on time in range. Diabetes Care. 2019;42(8):1593–603.

28. Tozzo V, Genco M, Omololu SO, Mow C, Patel HR, Patel CH, et al. Estimating Glycemia From HbA1c and CGM: Analysis of Accuracy and Sources of Discrepancy. Diabetes Care [Internet]. 2024 Mar 1 [cited 2025 Mar 11];47(3):460–6. Available from: https://pubmed.ncbi.nlm.nih.gov/38394636/

29. Carlson NE, Horton KW, Hokanson JE, Cleary PA, Jacobs DR, Brunzell JD, et al. Weight gain trajectories and obesity rates in intensive and conventional treatments of Type 1 diabetes from the DCCT compared to a control population without diabetes. Diabet Med. 2022 May 1;39(5):e14794.

30. Cherubini V, Skrami E, Iannilli A, Cesaretti A, Paparusso AM, Alessandrelli MC, et al. Disordered eating behaviors in adolescents with type 1 diabetes: A cross-sectional population-based study in Italy. Int J Eat Disord. 2018 Aug 1;51(8):890–8.

31. Martínez-Ramonde T, Alonso N, Cordido F, Cervelló E, Cañizares A, Martínez-Peinado P, et al. Importance of exercise in the control of metabolic and inflammatory parameters at the moment of onset in type 1 diabetic subjects. Exp Clin Endocrinol Diabetes [Internet]. 2014 [cited 2025 Feb 19];122(6):334–40. Available from: https://pubmed.ncbi.nlm.nih.gov/24798862/

32. Galassetti P, Riddell MC. Exercise and type 1 diabetes (T1DM). Compr Physiol [Internet]. 2013 [cited 2025 Feb 19];3(3):1309–36. Available from: https://pubmed.ncbi.nlm.nih.gov/23897688/

33. Aljawarneh YM, Wardell DW, Wood GL, Rozmus CL. A Systematic Review of Physical Activity and Exercise on Physiological and Biochemical Outcomes in Children and Adolescents With Type 1 Diabetes. J Nurs Scholarsh [Internet]. 2019 May 1 [cited 2025 Feb 19];51(3):337–45. Available from: https://pubmed.ncbi.nlm.nih.gov/30895735/

34. Seget S, Jarosz-Chobot P, Ochab A, Polanska J, Rusak E, Witoszek P, et al. Body mass index, basal insulin and glycemic control in children with type 1 diabetes treated with the advanced hybrid closed loop system remain stable - 1-year prospective, observational, two-center study. Front Endocrinol (Lausanne) [Internet]. 2022 Oct 11 [cited 2025 Mar 11];13. Available from: https://pubmed.ncbi.nlm.nih.gov/36303875/

35. Granados A, Orrego Castellanos J, Martinez Sanchez A, Giraldo MJ, Carrillo-Iregui A. Assessing the efficacy of a hybrid closed loop system in a racial-ethnic minority cohort of children and adolescents with type 1 diabetes. J Pediatr Endocrinol Metab [Internet]. 2025 [cited 2025 Mar 11]; Available from: https://pubmed.ncbi.nlm.nih.gov/39957128/

36. Tauschmann M, Allen JM, Wilinska ME, Thabit H, Acerini CL, Dunger DB, et al. Home Use of Day-and-Night Hybrid Closed-Loop Insulin Delivery in Suboptimally Controlled Adolescents With Type 1 Diabetes: A 3-Week, Free-Living, Randomized Crossover Trial. Diabetes Care [Internet]. 2016 Nov 1 [cited 2022 Aug 16];39(11):2019–25. Available from: https://pubmed.ncbi.nlm.nih.gov/27612500/

37. Bally L, Thabit H, Kojzar H, Mader JK, Qerimi-Hyseni J, Hartnell S, et al. Day-and-night glycaemic control with closed-loop insulin delivery versus conventional insulin pump therapy in free-living adults with well controlled type 1 diabetes: an open-label, randomised, crossover study. Lancet Diabetes Endocrinol [Internet]. 2017 Apr 1 [cited 2022 Aug 16];5(4):261–70. Available from: https://pubmed.ncbi.nlm.nih.gov/28094136/

38. Ruan Y, Thabit H, Leelarathna L, Hartnell S, Willinska ME, Dellweg S, et al. Variability of Insulin Requirements Over 12 Weeks of Closed-Loop Insulin Delivery in Adults With Type 1 Diabetes. Diabetes Care [Internet]. 2016 May 1 [cited 2023 Nov 29];39(5):830–2. Available from: https://pubmed.ncbi.nlm.nih.gov/26965717/

39. Leelarathna L, Dellweg S, Mader JK, Allen JM, Benesch C, Doll W, et al. Day and night home closed-loop insulin delivery in adults with type 1 diabetes: three-center randomized crossover study. Diabetes Care [Internet]. 2014 [cited 2022 Aug 16];37(7):1931–7. Available from: https://pubmed.ncbi.nlm.nih.gov/24963110/

40. Ng SM, Wright NP, Yardley D, Campbell F, Randell T, Trevelyan N, et al. Real world use of hybrid-closed loop in children and young people with type 1 diabetes mellitus-a National Health Service pilot initiative in England. Diabet Med [Internet]. 2023 Feb 1 [cited 2023 Nov 29];40(2):e15015. Available from: https://pubmed.ncbi.nlm.nih.gov/36424877/


**Table 1:** Transition Outcomes of 170 Children and Young People with Type 1 Diabetes from CGM to Automated Insulin Delivery: Baseline, 3-, 6-, and 12-Month Results

|  |  | **Baseline (CGM)**  **Mean (±SD)** | **3 months (AID)**  **Mean (±SD)** | **6 months (AID)**  **Mean (±SD)** | **12 months (AID)**  **Mean (±SD)** | **p value** |
| --- | --- | --- | --- | --- | --- | --- |
| **Anthropometrics** |  |  |  |  |  |  |
| BMI Z score | **Mean (±SD)** | 0.75 (±1.27) | b | 0.90 (±1.28)**a** | 0.88 (±1.26)**a** | **<0.001** |
| Daily insulin: (u/kg/day) (90 days) | **Mean (±SD)** | 0.89 (±0.27) | b | 0.84 (±0.28) | 0.89 (±0.26) | 0.155 |
| HbA1c (mmol/mol) | **Mean (±SD)** | 61.9 (±10.1) | b | 54.8 (±9.4)**a** | 55.9 (±9.7)**a** | **<0.001** |
|  |  |  |  |  |  |  |
| **CGM metrics (90 days)** |  |  |  |  |  |  |
| MBG (mmol/L) | **Mean (±SD)** | 10.7 (±1.7) | 9.1 (±0.9)**a** | 9.4 (±1.2)**a** | 9.5 (±1.4)**a** | **<0.001** |
| TBR2%: <3.0 mmol/L | **Median (IQR)** | 0.4 (±0.8) | 0.4 (±0.8) | 0.4 (±0.7) | 0.4 (±0.7) | 0.938 |
| TBR%: <3.9 mmol/L | **Median (IQR)** | 2.1 (±2.0) | 2.0 (±1.7) | 1.9 (±1.4) | 1.8 (±1.5) | 0.125 |
| TITR%: 3.9-7.8 mmol/L | **Mean (±SD)** | 29.0 (±10.5) | 44.1 (±9.4)**a** | 42.0 (±10.2)**a** | 40.6 (±10.8)**a** | **<0.001** |
| TIR%: 3.9-10.0 mmol/L | **Mean (±SD)** | 48.2 (±13.5) | 65.4 (±9.5)**a** | 63.0 (±11.0)**a** | 62.1 (±11.7)**a** | **<0.001** |
| TAR%: >10.0 mmol/L | **Mean (±SD)** | 49.6 (±14.2) | 32.6 (±9.6)**a** | 35.1 (±11.2)**a** | 36.1 (±12.1)**a** | **<0.001** |
| TAR2%: >13.9 mmol/L | **Mean (±SD)** | 23.2 (±13.1) | 11.9 (±7.0)**a** | 13.5 (±9.4)**a** | 14.7 (±10.0)**a** | **<0.001** |
| Co-efficient of Variation (%) | **Mean (±SD)** | 39.9 (±5.0) | 39.7 (±6.9)**a** | 39.4 (±4.5)**a** | 39.0 (±4.5)**a** | 0.257 |
| Percent sensor use (%) | **Mean (±SD)** | 83 (±15.6) | 90.6 (±7.4)**a** | 93.3 (±6.9)**a** | 93.8(±8.6)**a** | **<0.001** |

**a** Significantly different from baseline at p < 0.001 (Bonferroni post-hoc test)

b Data not available

Abbreviations: AID; automated insulin delivery, CGM; Continuous Glucose Monitoring, GMI; Glucose Management Indicator, MBG; mean blood glucose, TBR2; time below range level 2, TBR; time below range, TITR; time in tight range, TIR; time in range, TAR; time above range, TAR2; time above range level 2.

**Table 2:** Anthropometric and Glycaemic Metrics by BMI z-Score Group Before and Six Months After Automated Insulin Delivery System Initiation

|  | **Obese**  **BMI z-score ≥2**  **n = 34** | | | **Overweight**  **BMI z-score ≥1 to ≤-2**  **n = 45** | | | **Healthy weight above average**  **BMI z score >0 to <1**  **n = 45** | | | **Healthy weight below average**  **BMI z-score >-2 to ≤0**  **n = 38** | | | **Underweight**  **BMI z-score ≤-2**  **n = 8** | | |
| --- | --- | --- | --- | --- | --- | --- | --- | --- | --- | --- | --- | --- | --- | --- | --- |
| **Characteristics** | Before AID  Mean (±SD) | 6 months post-AID  Mean (±SD) | P value | Before AID Mean (±SD) | 6 months post-AID  Mean (±SD) | P value | Before AID Mean (±SD) | 6 months post-AID  Mean (±SD) | P value | Before AID Mean (±SD) | 6 months post-AID  Mean (±SD) | P value | Before AID Mean (±SD) | 6 months post-AID  Mean (±SD) | P value |
| **Anthropometrics** |  |  |  |  |  |  |  |  |  |  |  |  |  |  |  |
| BMI Z score | 2.44 (±0.38) | 2.45 (±0.52) | 0.859 | 1.40 (±0.27) | 1.45 (±0.43) | 0.814 | 0.46 (±0.27) | 0.52 (±0.47) | 0.321 | -0.59 (±0.36) | -0.21 (±0.68) | **<0.001** | -2.31 (±0.35) | 1.19 (±1.33) | **0.032** |
| Daily insulin: (u/kg/day) | 0.96 (±0.28) | 0.87 (±0.27) | **0.028** | 0.90 (±0.35) | 0.87 (±0.38) | 0.353 | 0.83 (±0.20) | 0.78 (±0.19) | 0.113 | 0.87 (±0.16) | 0.85 (±0.12) | 0.473 | 1.08 (±0.35) | 0.93 (±0.27) | 0.088 |
| HbA1c (mmol/mol) | 62.7 (±10.8) | 55.9 (±8.7) | **<0.001** | 62.0 (±9.7) | 55.6 (±10.4) | **<0.001** | 61.4 (±10.0) | 54.4 (±7.19) | **<0.001** | 60.7 (±10.3) | 52.7 (±6.9) | **<0.001** | 64.7 (±9.7) | 55.0 (±7.6) | **0.001** |
| **CGM metrics** |  |  |  |  |  |  |  |  |  |  |  |  |  |  |  |
| MBG (mmol/L) | 11.0 (±1.73) | 9.5 (±1.1) | **<0.001** | 10.7 (±1.6) | 9.3 (±1.1) | **<0.001** | 10.4 (±1.5) | 9.0 (±0.9) | **<0.001** | 10.5 (±2.0) | 9.1 (±1.0) | **<0.001** | 11.1 (±1.6) | 9.3 (±0.5) | **<0.001** |
| TBR2%: <3.0 mmol/L | 0.3 (±0.6) | 0.3 (±0.6) | 0.385 | 0.5 (±0.8) | 0.3 (±0.4) | 0.083 | 0.6 (±0.9) | 0.6 (±0.8) | 0.802 | 0.5 (±1.0) | 0.4 (±0.9) | 0.486 | 0.3 (±0.5) | 0.4 (±0.7) | 0.297 |
| TBR%: <3.9 mmol/L | 1.8 (±1.8) | 1.8 (±1.2) | 0.985 | 2.5 (±2.3) | 1.9 (±1.1) | 0.079 | 2.4 (±1.9) | 2.4 (±1.8) | 0.852 | 2.0 (±2.1) | 1.8 (±1.5) | 0.466 | 1.4 (±0.9) | 1.4 (±0.9) | 0.952 |
| TITR%: 3.9-7.8 mmol/L | 27.5 (±10.5) | 40.9 (±9.7) | **<0.001** | 28.2 (±10.5) | 42.1 (±8.9) | **<0.001** | 30.7 (±10.3) | 45.2 (±9.9) | **<0.001** | 30.6 (±11.4) | 44.3 (±9.3) | **<0.001** | 26.0 (±7.9) | 41.5 (±4.6) | **<0.001** |
| TIR%: 3.9-10.0 mmol/L | 46.0 (±14.1) | 62.0 (±10.7) | **<0.001** | 47.3 (±13.3) | 63.6 (±9.7) | **<0.001** | 50.3 (±12.4) | 65.9 (±9.3) | **<0.001** | 49.9 (±14.5) | 65.7 (±9.7) | **<0.001** | 45.6 (±13.0) | 62.5 (±5.3) | **<0.001** |
| TAR%: >10.0 mmol/L | 52.2 (±15.2) | 37.4 (±11.8) | **<0.001** | 50.2 (±14.4) | 35.7 (±11.1) | **<0.001** | 47.2 (±12.8) | 32.0 (±9.8) | **<0.001** | 48.1 (±15.0) | 34.1 (±11.6) | **<0.001** | 53.0 (±13.4) | 37.0 (±8.0) | **0.005** |
| TAR2%: >13.9 mmol/L | 25.4 (±14.2) | 14.2 (±8.3) | **<0.001** | 23.3 (±12.3) | 12.6 (±8.4) | **<0.001** | 32.0 (±9.8) | 21.7 (±12.2) | **<0.001** | 23.0 (±14.1) | 11.1 (±7.1) | **<0.001** | 23.9 (±12.4) | 12.3 (±3.0) | **0.016** |
| COV (%) | 39.7 (±5.0) | 40.2 (±5.1) | 0.604 | 40.9(±5.0) | 40.0 (±9.3) | 0.542 | 39.9 (±5.3) | 39.3 (±4.8) | 0.452 | 39.2 (±4.7) | 39.2 (±5.3) | 0.962 | 37.8 (±5.1) | 38.6 (±2.9) | 0.659 |
| PSU (%) | 83.6 (±15.7) | 92.7 (±6.9) | **0.005** | 79.6 (±16.9) | 91.7 (±10.4) | **<0.001** | 84.7 (±13.2) | 94.0 (±4.4) | **<0.001** | 85.9 (±15.1) | 94.1 (±3.0) | **0.002** | 85.8 (±17.1) | 95.5 (±5.4) | 0.132 |

Abbreviations: MDI; multiple daily injections, CSII; continuous sub-cutaneous insulin infusion, GCSE; General Certificate of Secondary Education, AID; automated Insulin delivery; AutoAID; Automated Cloud-Integrated AID, ManualAID; Automated Cloud-Integrated and Algorithm Updated AID, 780G; MiniMed 780G System, CAMS; CamAPS Fx, CIQ; t:slim X2 with Control IQ (CIQ), OP5; Omnipod 5 System, COV; Co-efficient of variation GMI; Glucose Management Indicator, MBG; mean blood glucose, TBR2; time below range level 2, TBR; time below range, TITR; time in tight range, TIR; time in range, TAR; time above range, TAR2; time above range level 2, PSU; percent sensor use

**Table 3:** Comparison of Changes in Anthropometric and Glycaemic Metrics Between BMI z-Score Groups from Baseline (CGM) to Six Months Post-AID Initiation

| Characteristics | **Obese**  **BMI z-score ≥2**  **n = 34**  **Δ mean (95% CI)** | **Overweight**  **BMI z-score ≥1 to ≤-2**  **n = 45**  **Δ mean (95% CI)** | **Healthy weight above average**  **BMI z score >0 to <1**  **n = 45**  **Δ mean (95% CI)** | **Healthy weight below average**  **BMI z-score >-2 to ≤0**  **n = 38**  **Δ mean (95% CI)** | **Underweight**  **BMI z-score ≤-2**  **n = 8**  **Δ mean (95% CI)** | **P value** |
| --- | --- | --- | --- | --- | --- | --- |
| **Anthropometrics** |  |  |  |  |  |  |
| *∆*BMI Z score | 0.01 (-0.09 to 0.11) | 0.05 (-0.05 to 0.16) | 0.06 (-0.04 to 0.17) | 0.38 (0.21 to 0.57)b | 1.13 (0.13 to 2.12)a | **<0.001** |
| *∆*Daily insulin: (u/kg/day) | 0.09 (-0.17 to -0.01) | -0.03 (-0.09 to 0.03) | -0.05 (-0.11 to 0.01) | -0.02 (-0.8 to 0.4) | -0.15 (-3.3 to 0.03) | 0.373 |
| *∆*HbA1c (mmol/mol) | -6.8 (-9.8 to -3.7) | -6.4 (-9.3 to -3.4) | -7.1 (-9.7 to -4.4) | -8.0 (5.0 to 11.0) | -9.8 (-14.3 to -5.2) | 0.845 |
| **CGM metrics** |  |  |  |  |  |  |
| *∆*MBG (mmol/L) | -1.5 (-1.9 to -1.1) | -1.4 (-1.8 to -1.0) | -1.4 (-1.8 to –1.0) | -1.4 (-1.9 to -0.9) | -1.7 (-2.6 to -0.8) | 0.976 |
| *∆*TBR2%: <3.0 mmol/L | 0.1 (-0.1 to 0.3) | -0.2 (-0.5 to 0.3) | 0.0 (-0.3 to 0.4) | 0.1 (-0.3 to 0.2) | 0.1 (-0.2 to 0.6) | 0.420 |
| *∆*TBR%: <3.9 mmol/L | 0.0 (-0.6 to 0.6) | -0.6 (-1.4 to 0.1) | 0.0 (-0.7 to 0.6) | -0.2 (-0.7 to 0.3) | 0.0 (-0.8 to 0.9) | 0.582 |
| *∆*TITR%: 3.9-7.8 mmol/L | 13.4 (10.7 to 15.9) | 13.9 (10.8 to 17.0) | 14.5 (10.8 to 18.2) | 13.7 (10.6 to 16.9) | 15.5 (11.9 to 19.0) | 0.978 |
| *∆*TIR%: 3.9-10.0 mmol/L | 16.1 (12.5 to 19.6) | 16.3 (12.8 to 19.9) | 15.6 (12.0 to 19.1) | 15.8 (12.0 to 19.6) | 16.9 (9.9 to 24.0) | 0.997 |
| *∆*TAR%: >10.0 mmol/L | -14.9 (-18.7 to -10.9) | -14.6 (-18.5 to -10.6) | -15.3 (-19.3 to -11.2) | -14.0 (-17.9 to -10.0) | -16.0 (-25.5 to -6.5) | 0.988 |
| *∆*TAR2%: >13.9 mmol/L | -11.2 (-14.7 to -7.8) | -10.6 (-13.8 to -7.5) | -10.4 (-13.6 to -7.3) | -11.9 (-15.6 to -8.1) | -11.6 (-20.3 to -2.9) | 0.978 |
| *∆*COV (%) | 0.5 (-1.5 to -2.5) | -0.9 (-4.1 to 2.1) | -0.7 (-2.4 to 1.1) | 0.0 (-1.6 to 1.5) | 0.8 (-3.2 to 4.8) | 0.881 |
| *∆*PSU (%) | 9.1 (3.0 to 15.2) | 12.3 (7.1 to 17.6) | 9.4 (-5.6 to 13.2) | 8.2 (3.3 to 13.2) | 8.9 (-3.4 to 21.3) | 0.794 |

Abbreviations: MDI; multiple daily injections, CSII; continuous sub-cutaneous insulin infusion, GCSE; General Certificate of Secondary Education, AID; automated Insulin delivery; AutoAID; Automated Cloud-Integrated AID, ManualAID; Automated Cloud-Integrated and Algorithm Updated AID, 780G; MiniMed 780G System, CAMS; CamAPS Fx, CIQ; t:slim X2 with Control IQ (CIQ), OP5; Omnipod 5 System, COV; Co-efficient of variation GMI; Glucose Management Indicator, MBG; mean blood glucose, TBR2; time below range level 2, TBR; time below range, TITR; time in tight range, TIR; time in range, TAR; time above range, TAR2; time above range level 2, PSU; percent sensor use

a Underweight group is significantly different from all other groups (p < 0.001)

b Healthy weight below normal group is significantly different from Healthy weight above normal, overweight, and obese, (p < 0.05)

**Table 4:** Final Mixed-Effects Model for BMI z-Score Change from Baseline to Six Months

| **Predictor** | **Estimate (B)** | **Std. Error** | **95% CI Lower** | **95% CI Upper** | **df** | **t-value** | **p-value** |
| --- | --- | --- | --- | --- | --- | --- | --- |
| Intercept | -0.47 | 0.22 | -0.90 | -0.04 | 166 | -2.17 | 0.032 |
| Baseline MBG | 0.07 | 0.02 | 0.03 | 0.11 | 166 | 3.43 | <0.001 |
| Baseline BMI z-score | -0.14 | 0.20 | -0.19 | -0.09 | 166 | -5.22 | <0.001 |
| BMI z-score × MBG | -0.04 | 0.02 | -0.07 | 0 | 166 | -2.27 | 0.025 |

**Figure 1:** A**:** Changes in BMI z-Score, B: Change in Time in Range (3.9–10.0 mmol/L), C: Change in Insulin Dose (u/kg/day,) over Six Months of AID Therapy by Baseline BMI z-Score Category
